# Supplementary material
Source: PubMed Central journal article supplement (PMC2775827)
Supplement: mmc1.pdf [file mmc1.pdf]

Supplemental Data

*AJHG*, Volume 85

**A Distinct DNA-Methylation Boundary in the  
5'- Upstream Sequence of the *FMR1* Promoter Binds  
Nuclear Proteins and Is Lost in Fragile X Syndrome**

Anja Naumann, Norbert Hochstein, Stefanie Weber, Ellen Fanning, and Walter Doerfler

**Figure S1. Partial Map of the *FMR1* Gene and Its 5'-Upstream Region – Control Experiments**

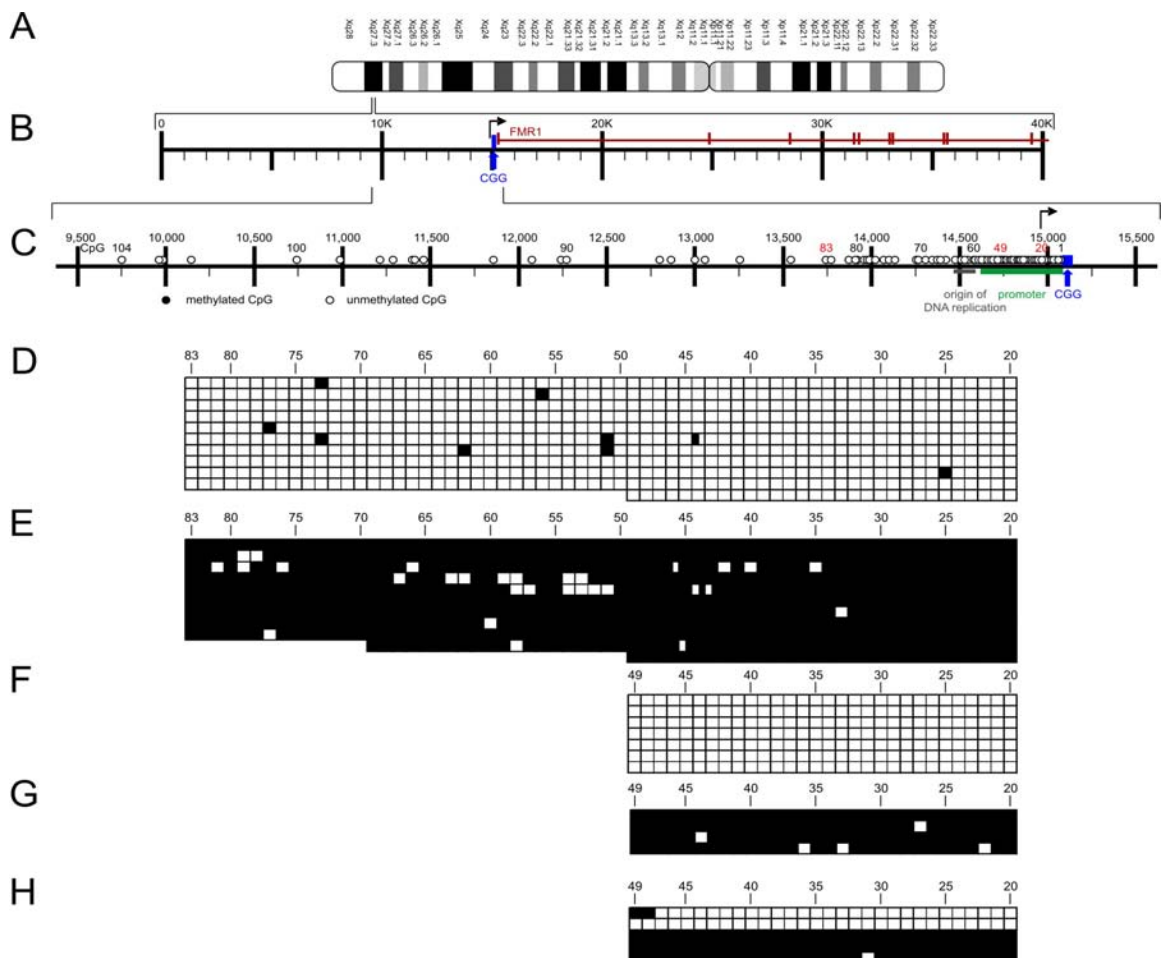

- (A) Ideogram of the human X chromosome.
- (B) Partial map shows the first ten exons (vertical bars) and introns of the *FMRI* gene plus the upstream genome segment including the CGG repeat.
- (C) The graph presents all CpG dinucleotides (1 to 104) in the region: Open circles designate unmethylated, closed circles methylated CpG dinucleotides. The arrow indicates the start site of transcription. The promoter and an origin of DNA replication are also indicated. Nucleotide numbering in this and the following graphs was adapted from the NCBI nucleotide nomenclature: NC\_000023:146,786,201-146,840,303 *H. sapiens FMRI* gene region (nucleotide numbers on the human X = 23<sup>rd</sup> chromosome).
- (D, E) Human DNA from a commercial source was obtained in the unmethylated (D) or the *M.Sss I*-premethylated form (E), subjected to denaturation, bisulfite conversion, and PCR amplification of the *FMRI* promoter and 5'-upstream region, cloning and sequencing. With the exception of spurious deviations, the un-methylated DNA (CpG dinucleotides 20 to 83) registered as such (D), the premethylated DNA was recognized as 5-mC methylated DNA (E). The *M.Sss I* DNA methyltransferase methylates all CpG dinucleotides in a DNA sequence.
- (F, G) In a similar experiment, part of the *FMRI* 5'-upstream region (CpGs 20 to 49) as a pUC19-cloned DNA fragment<sup>25</sup> was treated in the same way. (F) unmethylated, (G) *M.Sss I*-premethylated DNA.
- (H) Analysis of a 1:1 mixture of DNA in (G) and (H). □ – unmethylated, ■ – methylated CpGs.

**Figure S2. Methylation Boundaries in the *FMRI* Upstream Region in DNA from Fetal and Adult Human Organs**

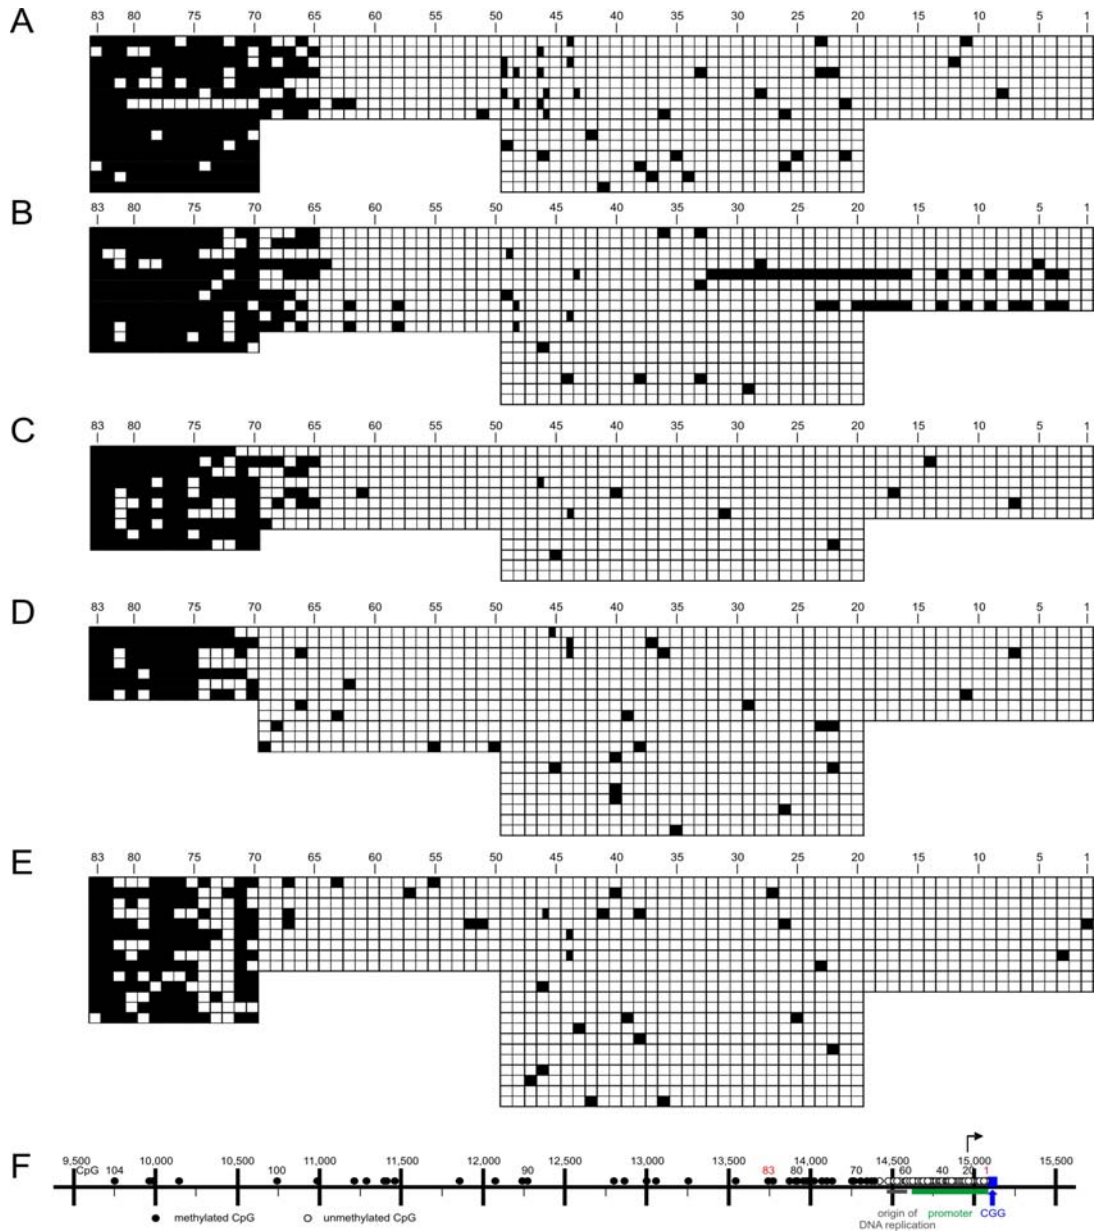

Human DNA from the following organs was analyzed: (A) fetal brain, (B) fetal liver; (C) adult brain, (D) adult liver, (E) adult muscle. (F) *FMRI* map as in Figure 2C.

**Table S1. Cells, Cell Lines and DNA Samples Analyzed in this Study**

| <b>1. Human Cell Line</b>                                  |        |       |                                                                                           |
|------------------------------------------------------------|--------|-------|-------------------------------------------------------------------------------------------|
| HCT116<br>colon carcinoma                                  | male   |       | ~ 30 5'-(CGG) <sub>n</sub> -3' repeats ATCC ' CCL-247                                     |
| <b>2. Primary Normal Human Cells</b>                       |        |       |                                                                                           |
| HFF<br>human foreskin fibroblasts                          | male   |       | Pediatric clinic,<br>Erlangen                                                             |
| PBMCs                                                      | male   |       | Volunteers from Institute for<br>Virology, Erlangen                                       |
| PBMCs                                                      | female |       | Volunteers from Institute for<br>Virology, Erlangen                                       |
| <b>3. Human DNA Samples</b>                                |        |       |                                                                                           |
| Brain                                                      | male   | adult | BioCat GmbH,<br>Heidelberg                                                                |
| Liver                                                      | male   | adult | BioCat GmbH,<br>Heidelberg                                                                |
| Skeletal muscle                                            | male   | adult | BioCat GmbH,<br>Heidelberg                                                                |
| Brain                                                      | male   | fetal | BioCat GmbH,<br>Heidelberg                                                                |
| Liver                                                      | male   | fetal | BioCat GmbH,<br>Heidelberg                                                                |
| <b>4. FRAXA Cells</b>                                      |        |       |                                                                                           |
| GM07072<br>primary FRAXA lung fibroblast                   | male   | 22 FW | ~ 450 5'-(CGG) <sub>n</sub> -3' repeats<br>Coriell Cell Repositories<br>(CCR), Camden, NJ |
| GM05848<br>primary FRAXA fibroblast                        | male   | 4 YR  | ~ 670 5'-(CGG) <sub>n</sub> -3' repeats<br>Coriell Cell Repositories<br>(CCR), Camden, NJ |
| 14,451<br>PBMCs                                            | male   | 9 YR  | ~ xxx 5'-(CGG) <sub>n</sub> -3' repeats<br>Institute of Human Genetics,<br>Erlangen       |
| <b>5. Mouse DNA Samples</b>                                |        |       |                                                                                           |
| Brain                                                      | male   | adult | BioCat GmbH,<br>Heidelberg                                                                |
| Liver                                                      | male   | adult | BioCat GmbH,<br>Heidelberg                                                                |
| <b>6. Controls</b>                                         |        |       |                                                                                           |
| Unmethylated and bisulfite<br>converted human control DNA  |        |       | Qiagen GmbH,<br>Hilden                                                                    |
| Premethylated and bisulfite<br>converted human control DNA |        |       | Qiagen GmbH,<br>Hilden                                                                    |
| pUC19-FMR1: unmethylated,<br>premethylated, 1:1 mixture    |        |       | Vanderbilt University,<br>Nashville, TE                                                   |

**Table S2. Primers Used in This Study**

| Primer                                                                      | Position |     | Sequence 5' to 3'                             | Strand |
|-----------------------------------------------------------------------------|----------|-----|-----------------------------------------------|--------|
| <b>NC_000023:146,786,201-146,840,303 <i>H. sapiens</i> FMRI gene region</b> |          |     |                                               |        |
| P33                                                                         | 13,659   | f   | TTA ATT TAG TGT TAT TAG TTA ATT TTT ATT       | upper  |
| P34                                                                         | 13,699   | f n | TAG TTG GAA TTA TTT TTT TTT TTT TAT TTT       | upper  |
| P35                                                                         | 14,288   | r n | AAA CCT TTC CTC AAA CCC AAC TTT AAC CCA       | upper  |
| P36                                                                         | 14,348   | r   | CCC TAT AAA AAC ACC CTA TAC CCT TTA AAA       | upper  |
| P29                                                                         | 14,169   | f   | GTA GAA ATG AAT TTT AAG TGT TTA ATA TAA       | upper  |
| P30                                                                         | 14,259   | f n | TGG GTT AAA GTT GGG TTT GAG GAA AGG TTT       | upper  |
| P31                                                                         | 14,788   | r n | AAA AAC CRA CCR AAA TAC CRA ATC RAA AAA       | upper  |
| P32                                                                         | 14,838   | r   | CCC CRC CCT CTC TCT TCA AAT AAC CTA AAA       | upper  |
| P25                                                                         | 14,664   | f   | GGG YGT TTT GGT TTT YGY GAG GTA GTG YGA TT    | upper  |
| P26                                                                         | 14,699   | f n | TAT YGT TTT TTA GTT TTT TYG TTT TTT ATT AAG   | upper  |
| P27                                                                         | 14,991   | r n | RCC CRC TCA AAA ACR ACC CTC CAC CRA AAA TAA A | upper  |
| P28                                                                         | 15,056   | r   | ACC RCA CRC CCC CTA ACA ACR ACR CCT CCR T     | upper  |
| P21                                                                         | 14,589   | f   | AAT CCC AAA AAA ACC RAA CTA AAA TAA CCR       | lower  |
| P22                                                                         | 14,629   | f n | ATT TCC CAC RCC ACT AAA TAC ACC TCT ACA       | lower  |
| P23                                                                         | 14,838   | r n | TTT YGT TTT TTT TTT TTA AGT GGT TTG GGA       | lower  |
| P24                                                                         | 14,878   | r   | ATT AAY GTT GTT TTT TTT TTT YGY GGG TTT       | lower  |
| P92                                                                         | 9,560    | f   | ACA AAA CCC ATA AAT ACA AAA                   | lower  |
| P93                                                                         | 9,670    | f n | AAT TCA ATA AAA AAA CAA TAA TC                | lower  |
| P94                                                                         | 10,225   | r n | TAA TAG GTG TAT AGT AGA AT                    | lower  |
| P95                                                                         | 10,345   | r   | AGA TGA TTT TTT AAA GTG GTT G                 | lower  |
| P96                                                                         | 10,530   | f   | AAT AAA CAA ACC ATA ATA TA                    | lower  |
| P97                                                                         | 10,669   | f n | ACA TAC TAT ATA ATT CCA ACT                   | lower  |
| P98                                                                         | 11,042   | r n | AAA ATT AAG TAG ATA GTG GAG AG                | lower  |
| P99                                                                         | 11,121   | r   | TGA TTT TTT ATT TAA ATG AG                    | lower  |
| P100                                                                        | 11,109   | f   | AAA TAA AAA ATC ATA ATT AAA AAA AAT TAT       | lower  |
| P101                                                                        | 11,159   | f n | AAA TAT AAC TTT AAC TAA ATC CTA AAA AAT       | lower  |
| P102                                                                        | 11,508   | r n | TTT GTT TTT AGT GTT TAT TAT AGT GTT TGG       | lower  |
| P103                                                                        | 11,540   | r   | AGA ATA AAG ATT TTT ATT TGT TTT ATT TAT       | lower  |
| P40                                                                         | 11,531   | f   | TCT TTA TTC TCA CTA AAC TTA C                 | lower  |
| P41                                                                         | 11,808   | f n | AAA CTA AAT AAA TTT CAT ACA C                 | lower  |
| P42                                                                         | 12,304   | r n | TTA AAG TTT TTT TTT TTT TT                    | lower  |
| P43                                                                         | 12,417   | r   | TTT GAT TTT GAG TTT TAG TTT                   | lower  |
| P108                                                                        | 12,594   | f   | TAT TCT AAT ACA CTA ACC ATC ATA ATA AAA       | lower  |
| P109                                                                        | 12,659   | f n | AAC AAT ATA ATA AAA AAA CAA AAA ATA TAC       | lower  |
| P110                                                                        | 12,963   | r n | TGT TTA TGT TTT TTG TAT TTA TAG AGA TGG       | lower  |
| P111                                                                        | 13038    | r   | TTA TTT TTA TTT TTT TAG ATA TAA GTT GTA       | lower  |
| P112                                                                        | 12,869   | f   | ATA AAT ATA ACT CAA AAA CAA ACT ATT AAA       | lower  |
| P113                                                                        | 12,904   | f n | CAA TAA AAA ATA AAA ATT TAC AAT CCA ATA       | lower  |
| P114                                                                        | 13,308   | r n | TAT TAT AAG TTA TAT TTA ATT TGT GTT GTT       | lower  |
| P115                                                                        | 13,348   | r   | TTT AGG GTT TAA AAA TAT GTT AAT TTT TTA       | lower  |
| P116                                                                        | 13,359   | f   | AAC AAC TTA CAC TTA AAA AAA TAT AAT CAT       | lower  |
| P117                                                                        | 13,419   | f n | ACA TTA AAA TTA CAA CTA ATA CTC TAC TCC       | lower  |

|      |        |     |                                                 |       |
|------|--------|-----|-------------------------------------------------|-------|
| P118 | 13,615 | r n | AGG ATG TTG TTG TTG GTG GAA TTT TAG TTT         | lower |
| P119 | 13,648 | r   | ATG ATT TGT TTT AGG TAG GTG TTT TAG AAT         | lower |
| P13  | 13,659 | f   | CCA ACT CAA TAC TAT TAA TTA ACT CTC ACC         | lower |
| P14  | 13,699 | f n | CAA CTA AAA TCA TCT CCC CTT CTC CAC CCC         | lower |
| P15  | 14,288 | r n | GAG TTT TTT TTT AGA TTT AGT TTT GAT TTA         | lower |
| P16  | 14,348 | r   | TTT TGT GGA GAT ATT TTG TGT TTT TTA AGG         | lower |
| P9   | 14,169 | f   | ACA AAA ATA AAC CTC AAA TAC TTA ACA CAA         | lower |
| P10  | 14,259 | f n | TAA ATC AAA ACT AAA TCT AAA AAA AAA CTC         | lower |
| P11  | 14,788 | r n | GGG AAT YGG TYG GGG TGT YGG GTY GAA AGA         | lower |
| P12  | 14,838 | r   | TTT YGT TTT TTT TTT TTA AGT GGT TTG GGA         | lower |
| P1   | 14,664 | f   | AAA CRT TCT AAC CCT CRC RAA ACA AAT ACR ACC     | lower |
| P2   | 14,699 | f n | CAC CRC CCT TCA ACC TTC CCR CCC TCC ACC AAG     | lower |
| P3   | 14,991 | r n | GTT YGT TTA GAG GGY GGT TTT TAT YGG AAG TGA A   | lower |
| P4   | 15,056 | r   | GTY GTA YGT TTT TTG GTA GYG GYG TTT TYG T       | lower |
| P5   | 14,956 | f   | ATT TCA CTT CCR ATA AAA AAC CRC CTC TAA ACR AAC | lower |
| P6   | 15,029 | f n | AAA ACR CCR CTA CCA AAA AAC RTA CRA CAA C       | lower |
| P7   | 15,155 | r n | TTT YGA GAG GTG GGT TGY GGG YGT TYG AGG TTT AG  | lower |
| P8   | 15,195 | r   | TTT TAT TTT TTT TTT AGT TTT GTT AGY GTY GGG AG  | lower |

**NC\_000086:65,916,730-65,971,138 *M. musculus Fmr1* gene region**

|     |        |     |                                         |       |
|-----|--------|-----|-----------------------------------------|-------|
| M13 | 13,447 | f   | TAA AAC AAC TCA CCC TTA CTC TTT CAA ATA | lower |
| M14 | 13,497 | f n | TCT TAT CAC ATT CCA ATT AAA ATC ATC TTA | lower |
| M15 | 13,984 | r n | TAG GAG TAG ATG TGT AAA ATT TAA TTT TTT | lower |
| M16 | 14,030 | r   | GGT GAG GTA GTA ATA AAA AGA TTG TTA TTA | lower |
| M9  | 14,061 | f   | AAC ACA TAA TAA ACA TTC AAT AAA CTT CTC | lower |
| M10 | 14,096 | f n | AAT ACA AAC CTT CTA AAT TAA AAA AAC ATA | lower |
| M11 | 14,420 | r n | TTT TTT TTT TAG ATA GTT TTT TTT ATA TTT | lower |
| M12 | 14,460 | r   | TAA GGG TTA ATA GGG TGT GTT AGA ATT TTA | lower |
| M5  | 14,391 | f   | AAA TAT AAA AAA AAC TAT CTA AAA AAA AAA | lower |
| M6  | 14,431 | f n | TAA AAT TCT AAC ACA CCC TAT TAA CCC TTA | lower |
| M7  | 14,893 | r n | TTT TTT GGG TAT TTG TTT TAG GGT ATT AGG | lower |
| M8  | 14,936 | r   | TTY GTT TTT GTT TTT TTT YGG GTA GTG GAG | lower |
| M1  | 14,831 | f   | CCT TTC ACC AAA TAC RCR CRC CAA AAA ATA | lower |
| M2  | 14,864 | f n | CCT AAT ACC CTA AAA CAA ATA CCC AAA AAA | lower |
| M3  | 15,226 | r n | GGA GGT GGG TTG TAG GYG TTT GAG GTT TAG | lower |
| M4  | 15,295 | r   | GGA GTT TYG TAT TTT TAT TAT TAG TTT TTT | lower |

Y = C or T; R = A or G; f = forward primer; r = reverse primer; n = nested PCR primer

The upper or lower strand was amplified during PCR.
